# Supplementary material
Source: PubMed Central journal article supplement (PMC4217398)
Supplement: pnas.1402536111.sapp.pdf [file pnas.1402536111.sapp.pdf]

## SUPPLEMENTARY Information

### Detailed description of the materials and methods used:

**Bacterial strains, plasmids, media and growth conditions.** The bacterial strains and the plasmid vectors and their derivatives used in this study are summarized in Table S1. *E. coli* and *P. aeruginosa* strains were routinely propagated at 37 °C on Luria-Bertani (LB) agar or LB broth (1) and all liquid cultures were grown with shaking (225 rpm). When required, antibiotics were used in selective media at the following concentrations ( $\mu\text{g ml}^{-1}$ ) for *E. coli*: tetracycline (Tc) 30, ampicillin (Am) 200 and chloramphenicol (Cm) 25; for *P. aeruginosa*: carbenicillin (Cb) 200, gentamicin (Gm) 100 and tetracycline 50. For experiments assessing the effect of temperature, PPGAS medium (phosphate-limited-peptone-glucose-ammonium) (2) was inoculated to an OD<sub>600</sub> of 0.1 with *P. aeruginosa* overnight cultures grown in LB supplemented with the appropriate antibiotics and incubated at 30°C or at 37 °C. For assays of  $\beta$ - galactosidase activity, bacterial cultures were monitored spectrophotometrically by measuring their optical density at 600 nm (OD<sub>600</sub>) at 2 h intervals for 24 h (Fig. S6).

**DNA manipulations and genetic techniques.** DNA manipulations were carried out as described elsewhere (3). The plasmid DNA was prepared by a Qiaprep miniprep kit (Qiagen). DNA digestion and ligation were performed according to manufacturer's instructions (New England Biolabs). Polymerase chain reactions (PCR) were carried out using high fidelity DNA polymerase (Phusion Hot Start II) as specified by the manufacturer (Thermo Scientific). The PCR products were purified by Qiaquick PCR purification kits or Qiaquick gel extraction kits (Qiagen). DNA sequencing reactions for all constructs were undertaken by the DNA sequencing and oligonucleotide synthesis unit at the Instituto de Biotecnología, UNAM.

The oligonucleotides used are listed in Table S4. Restriction sites were added at the 5' ends of primers to facilitate the cloning of the PCR products. A fragment corresponding to the promoter region of *lecA* (nucleotides -445 to +63) was amplified by PCR using PAO1 genomic DNA as the template and the primers *lecAF/lecAR*. The resulting fragment was cloned into pJET1.2/blunt in accordance with the manufacturer's instructions (Fermentas) and then excised by digestion with *KpnI* and *XhoI*. The 508-bp

product was eluted from an agarose gel after electrophoresis, followed by cloning into the *KpnI* and *XhoI* restriction sites of the promoter-less pLP170 vector (4) to generate a transcriptional fusion to the *lacZ* gene, plasmid pLECA-70. For construction of the pHZA1-20 plasmid, a 1,782 bp fragment from nucleotide +244 of the *phzM* coding region (divergent to *phzA1*), that is equivalent to nucleotide -696 with respect to *phzA1*, to nucleotide +81 relative to the *phzA1* translation start codon was generated by PCR amplification using the primers phzA1EcoRI/phzA1KpnI. This fragment was cloned in pJET1.2/blunt, obtained by digestion and cloned into the *EcoRI* and *KpnI* restriction sites of pMP220 vector (5). The resulting plasmids were introduced into *E. coli* and *P. aeruginosa* strains as described previously (6, 7).

**Plasmid construction.** The inserts for plasmids pBO-*rhIA*, pBO-*rhIA*( $\Delta$ G78) and pBO-*rhIA*(G92A) were constructed by annealing single-stranded oligonucleotides. Briefly, 10 pmol  $\mu$ l<sup>-1</sup> of each of the following pairs of oligonucleotides: *rhIA*-pBADSc/*rhIA*-pBADaSc, *rhIA*-Sc-G78/*rhIA*aSc-G78 or *rhIA*-S-G92A/ *rhIA*-aS-G92A (Table S4) were mixed and heated at 60 °C for 30 min and annealed by slowly cooling down to room temperature. The resulting double stranded oligonucleotide was then ligated into *NheI*-*EcoRI* digested pBAD-18lacZ841 (Table S1). To construct plasmid pBOC-*rhIA* and pBOC*rhIA*(G92A), primers *rhIA*-FL-WT/*rhIA*-RLc-WT and *rhIA*-FL-WT/*rhIA*-RL-G92Ac (Table S4) were used to amplify a fragment of 110 bp corresponding to the complete ROSE-element present in the *rhIA* 5' UTR. PCR products digested with *EcoRI* and *NheI* were cloned into the corresponding sites of pBAD-18lacZ841. Plasmid pBO-*rhIA*,*rhIB* was generated by PCR amplification of a fragment containing the *rhIA* coding region with the small version of the ROSE-element and following an in-frame *lacZ* fusion starting with the AUG codon of *rhIB* using the *rhI*ATSpBAD18/*rhI*B-TRpBAD18 primers (Table S4). To create pBO- $\Delta$ *rhIA*,*rhIB*, plasmid pBO-*rhIA*,*rhIB* purified from *E. coli* strain IBEC58 (8) was digested with *MscI* in order to eliminate an internal fragment within the coding region of the *rhIA* gene (+548 to +874). Site-directed mutagenesis to generate plasmid pBOC-*rhIA*( $\Delta$ G78) with a deletion of the unpaired G78 was performed using the QuikChange XL site-directed mutagenesis kit (Agilent Technologies) according to the manufacturer's instructions. Plasmid pBOC-*rhIA* was used as the template and the mutagenesis was done with the primers *rhIA*- $\Delta$ G78F/*rhIA*- $\Delta$ G78R (Table S4). After verification of the DNA sequences, plasmids were transformed into *E. coli* DH5 $\alpha$ .

Transformants were selected on LB agar plates containing ampicillin (200  $\mu\text{g ml}^{-1}$ ) and X-gal (40  $\mu\text{g ml}^{-1}$ ) in the presence of 0.04% (w/v) L-arabinose. All  $\beta$ -galactosidase assays for *E. coli* carrying pBAD-18*lacZ*481 *rhIA* fusions were carried out in cells grown to exponential growth phase at 30 °C (OD<sub>600</sub> 0.5). L-arabinose was added to 0.04% and one sample of 25 ml was maintained at 30 °C. Another sample of equal volume was transferred to 37 °C, and both samples were incubated for 60 min.

To construct plasmid pBOC-*lasI* and pBOC-*lasI*[C84A], primers *lasI*-Ter Fw/*lasI*Ter-Rv and *lasI*-C84A-Fw/*lasI*-C84A-Rv (Table S4) were used, respectively. Cloning into pBAD-18*lacZ*841 and site-directed mutagenesis was undertaken as described above for the *rhIA* ROSE-element. The  $\beta$ -galactosidase activities for *P. aeruginosa* cells carrying the different promoter-probe plasmids (Table S1) were determined spectrophotometrically using *o*-nitrophenyl- $\beta$ -D-galactopyranoside (ONPG) as the substrate, normalized to the OD<sub>600</sub> of the bacterial culture and expressed in Miller Units (1).

To determine the effect of growth temperature on the expression of different promoter probe constructs, *E. coli* DH5 $\alpha$  was transformed with the plasmids and grown at 30 °C in LB medium until the exponential phase (optical density of 0.5 at 600 nm). Subsequently, L-arabinose was added to the culture to induce transcription at a concentration of 0.04% (unless in experiments shown in figure S6 where 0.01% was used). Then, half of the culture was maintained at 30 °C (white bars) and the other half was transferred to 37 °C (black bars) for 60 minutes before measuring  $\beta$ -galactosidase activity. The data are expressed as the mean of at least three independent experiments, each performed in duplicate.

$\beta$ -galactosidase assays for *E. coli* carrying pBAD-18*lacZ*481 *lasI* fusions were performed using Fluorescein di- $\beta$  D-galactopyranoside (FDG) as substrate. Briefly, 15 ml of LB was inoculated to an OD<sub>600</sub> of 0.01 with overnight cultures in LB supplemented with the appropriate antibiotics and incubated at 30 °C and 37 °C. The cells were grown to the exponential growth phase (OD<sub>600</sub> 0.5) and were cooled on ice.  $\beta$ -galactosidase activity was assayed by transferring 20  $\mu\text{l}$  of each culture to the wells of a black 96-well microplate, previously charged with stock solutions of FDG (150 mM in 8:1:1 H<sub>2</sub>O/DMSO/ethanol). All measurements were performed in a 200  $\mu\text{l}$  total volume. The samples were incubated at 30 °C and 37 °C for 12 h. Blanks and controls without cells, substrate or inducer were used to eliminate signal background. Fluorescence was

determined with a FL600 fluorescence microplate reader (BioTek Instruments) controlled by an external PC running the data reduction software package Gen5 (BioTek Instruments). Fluorescein production by the hydrolysis of FDG was monitored using a fluorescein filter set (Ex 485±20/Em 528±20) in the plate reader. The sensitivity setting was varied as required and the data were collected from the bottom. All assays were performed in triplicate. The results, normalized to OD<sub>600</sub>, were plotted as relative fluorescence units (RFU) and represent the average of triplicate determinations.

To generate plasmid pBOC-*lasR* (Table S1), oligonucleotides *lasR*-Ter-Fw/ *lasR*-Ter-Rv (Table S4) were used to amplify a fragment of 110 bp of the *lasR* 5' UTR. The PCR product was digested with *EcoRI* and *NheI* and cloned into the corresponding sites into pBAD-18lacZ841. To construct the negative control plasmid pBOC-*gyrA*, consisting of a sequence whose translation is not temperature-dependent (9), the primers *gyrA*EC-FW/*gyrA*EC-Rv (Table S4) were used. β-galactosidase assays for *E. coli* carrying the pBAD-18lacZ481 *gyrA* fusions were carried out as described above for *rhlA* fusions.

**RNA extraction and quantitative real-time PCR (qPCR).** To perform real-time quantitative PCR (qPCR) analysis, the bacteria were cultured and total RNA was purified as described for transcriptome analysis. For cDNA synthesis, 1 μg of RNA was reverse transcribed using a mix of specific reverse primers (Table S5) and the Revert-Aid H minus First Strand cDNA Synthesis kit (Thermo Scientific) according to the manufacturer's instructions. Differential expression of the *rhlA*, *rhlR*, *rhlI*, *lasI*, *lasB* and *phzA1* genes was examined by quantitative real-time RT-PCR using a Maxima SYBR Green/ROX qPCR Master Mix (2X) (Thermo Scientific) according to the manufacturer's instructions and a Light Cycler 480 II Instrument (Roche). Primer pairs were designed using the Primer3 program (10) and subjected to a BLAST analysis against the *P. aeruginosa* PAO1 genome sequence to eliminate the possibility of nonspecific binding. The cycling conditions used were one cycle of 95 °C for 10 min, followed by 45 cycles of 95 °C for 15 s and 60 °C for 60 s. The data were acquired during the 60 °C annealing step. Each analysis was performed at least three times from three independent cultures. As a reference gene to normalize the results, we used *lasR*, because its expression was very similar at both temperatures tested and its concentration was not affected by

temperature. The quantification technique used to analyze data was the  $2^{-\Delta\Delta CT}$  method (11).

**Microarray experiments and data analysis.** For microarray analysis of mRNA concentration, cells were grown in 15 ml of LB at 37 °C with shaking for 16 h. Overnight cultures were diluted to an OD<sub>600</sub> of 0.05 in PPGAS medium and grown at 25 °C and 37 °C. Samples were harvested at an OD<sub>600</sub> of 1.5 (Fig. S5) and the cells from 2.0 ml of each culture were suspended in 0.5 ml of fresh PPGAS media and added to 1.0 ml of RNA Protect bacteria solution (Qiagen). Total RNA was purified using RNAeasy spin columns (Qiagen) according to the manufacturer's instructions, and residual DNA was eliminated by DNase treatment using RNase-free DNaseI (Thermo Scientific). RNA quantity and quality were evaluated by spectrophotometry using a NanoDrop ND-1000 spectrophotometer (Thermo Scientific). RNA quality and integrity were confirmed on a denaturing agarose gel and RNA Nano chips in an Agilent Bioanalyzer 2100, respectively. cDNA synthesis, fragmentation, 3'-end labeling and hybridization to Affymetrix GeneChip *P. aeruginosa* genome arrays were carried out by a commercial Affymetrix Genechip service supplier (Affymetrix, Santa Clara, CA). Washing, staining and scanning of the microarrays were performed with the Affymetrix fluidic station. All experiments were performed in triplicate. Data analyses from three biological replicates for each of the conditions were performed after normalizing and summarizing probe level measurements using a Robust Multiarray Average (RMA). Only genes that fit stringent criteria (expression cutoff: 50–100% stringency; p-value  $\leq 0.01$  of one-way ANOVA data corrected by Benjamini Hochberg FDR; fold-change  $\geq 1.4$ ) were selected for further analysis. The microarray data were analyzed using the microarray software package Partek Genomic Suite 6.5 (Partek Inc., St. Louis, MO). The fold change was considered to be significant when the pair PAO1-25 °C versus PAO1-37 °C was at least 1.4-fold or greater up- or down-regulated ( $p \leq 0.05$ ). The list of genes whose expression was significantly altered is shown in Table S2. The microarray data is MIAME compliant and has been deposited in NCBI's Gene Expression Omnibus (GEO) and is accessible through GEO Series accession number GSE45695.

**SDS gel electrophoresis and western blot analysis.** For the preparation of crude cell extracts, cultures were grown in PPGAS medium at 30° C and 37 °C to an OD<sub>600</sub> of 1.5.

The cells were harvested by centrifugation and re-suspended in PA buffer (10 mM sodium phosphate buffer, 30 mM NaCl, 0.25% Tween-20, 10 mM EDTA, 10 mM  $\beta$ -mercaptoethanol, pH 7.5) prior to cell disruption through sonication. Cellular debris was removed by centrifugation (13,000  $\times$  *g* for 15 min at 4 °C) and the supernatant (containing the soluble protein fraction) was mixed 1:1 v/v with Laemmli loading buffer (12). Total protein concentration was determined using a protein assay kit (Bio-Rad) with bovine serum albumin as the standard. Equal amounts of protein (30  $\mu$ g) were separated by 12% sodium dodecyl sulfate-polyacrylamide gel electrophoresis (SDS-PAGE) and the gels were electro-transferred onto Hybond-C Extra nitrocellulose membranes (Amersham Biosciences). The membrane was blocked by 5% nonfat milk and incubated with a 1:1000 dilution of the rabbit anti-RhIR, anti-LasR or anti-RhIA polyclonal antibodies.

Goat anti-rabbit immunoglobulin G (Santa Cruz Biotechnology) secondary antibody conjugated to horseradish peroxidase was used at a 1:10,000 dilution. Detection was performed using the chemiluminescence-based system Super-Signal West Femto (Pierce) followed by exposure to X-ray film (Amersham Biosciences) for autoradiography.

**Virulence factors production.** Pyocyanin was extracted from culture supernatants and measured as previously described based on its absorbance at 520 nm in acidic solution (13). The pyocyanin assay is based on the absorbance of pyocyanin at 520 nm in acidic solution. A 5 ml sample of culture supernatant was extracted with 3 ml of chloroform and then re-extracted into 1 ml of 0.2 N HCl to give a pink to deep red solution. The absorbance of this solution was measured at 520 nm. Concentrations, expressed as  $\mu$ g of pyocyanin produced per ml of culture supernatant, were determined by multiplying the optical density at 520 nm ( $OD_{520}$ ) by a factor of 17.072.

The concentration of rhamnolipids in the sample was determined by the orcinol method (14). A 333  $\mu$ l portion of the filtered supernatant was extracted twice with 1 ml of diethyl ether. The diethyl-ether extract was evaporated to dryness and dissolved in 1 ml of deionized water. To 100  $\mu$ l of each sample, 900  $\mu$ l of a solution containing 0.19% orcinol (in 53% sulfuric acid) was added. The samples were heated at 80 °C in a water-bath for 30 min and cooled for 15 min at room temperature. The  $A_{421}$  was measured.

The concentrations of rhamnolipids were determined by comparing the data with a standard curve obtained with L-rhamnose standards between 0 and 50  $\mu\text{g ml}^{-1}$ .

The elastolytic activity of LasB elastase was determined using Elastin Congo Red (ECR) as substrate; the procedure was modified from that described previously (15). Briefly, the cells were grown to an  $\text{OD}_{600}$  of 1.5 in LB broth at 30 °C and 37 °C and samples of the filter-sterilized supernatants were diluted 1:10 with LB and 1 ml was added to 10 mg of ECR (Sigma) in glass tubes. The mixture was incubated at 37 °C for 16 h with constant shaking (225 rpm). The insoluble substrate was pelleted by centrifugation (13,000  $\times g$  for 10 min at 4 °C) and the absorbance of the supernatant was measured at 495 nm with a spectrophotometer using an ECR sample incubated with medium alone as the blank. The experiment was performed three times in triplicate with supernatants from three independent cultures. The values from the triplicate experiments were averaged and used as one value to represent each of the three experiments.

**N-Acyl-Homoserine Lactone (AHL) extraction and analytical thin-layer chromatography.** To evaluate the profiles of AHLs, cells were grown in PPGAS medium at 30 °C and 37 °C for 24 h (Fig. S5). A 10 ml sample of culture supernatant was extracted twice with equal volumes of acidified ethyl acetate and then dried in a fume hood. The residues from the extraction were then dissolved in 100  $\mu\text{l}$  ethyl acetate and a 5  $\mu\text{l}$  sample was analyzed by thin layer chromatography (TLC). Analytical TLC was performed on reverse phase aluminium-backed RP18 F254S TLC plates (20 cm X 20 cm; Merck) (16). The chromatograms were developed with methanol:water (60:40, v:v) and were then air-dried in a fume hood. The TLC plate was then overlaid with a thin film of agar seeded with the AHL reporter strain *Chromobacterium violaceum* CV026 that produces the purple-colored violacein in response to AHLs with N-acyl side chains between 4 and 8 carbons in length (17). After incubation of the plate at 30 °C for 24 h, AHLs were located as purple spots on a white background. Alternatively, TLC plates were overlaid with a thin layer of agar seeded with a culture of an *E. coli* biosensor strain containing the lux-based bioluminescence AHL reporter plasmid (pSB1075). This reporter contains the *P. aeruginosa lasR* gene and the *lasI* promoter fused to *luxCDABE* from *Photobacterium luminescens* and detects 3-oxo-substituted AHL derivatives with acyl chain lengths from 4 to 12 carbons (18). Light emission was

detected using a system for chemiluminescence detection Gel Logic 112 (Kodak). Each experiment was performed at least twice.

**Computer methods.** Sequences for computer analysis were retrieved from Pseudomonas Genome Database v 2 (<http://www.pseudomonas.com>). RNA secondary structures were predicted using Mfold version 3.2 (19) and the RNA-fold program of the Vienna RNA package (20).

**Statistical analysis.** Student's t-test was used to analyze statistical differences between samples grown at two different temperatures. A  $p$ -value of  $<0.05$  was considered statistically significant.



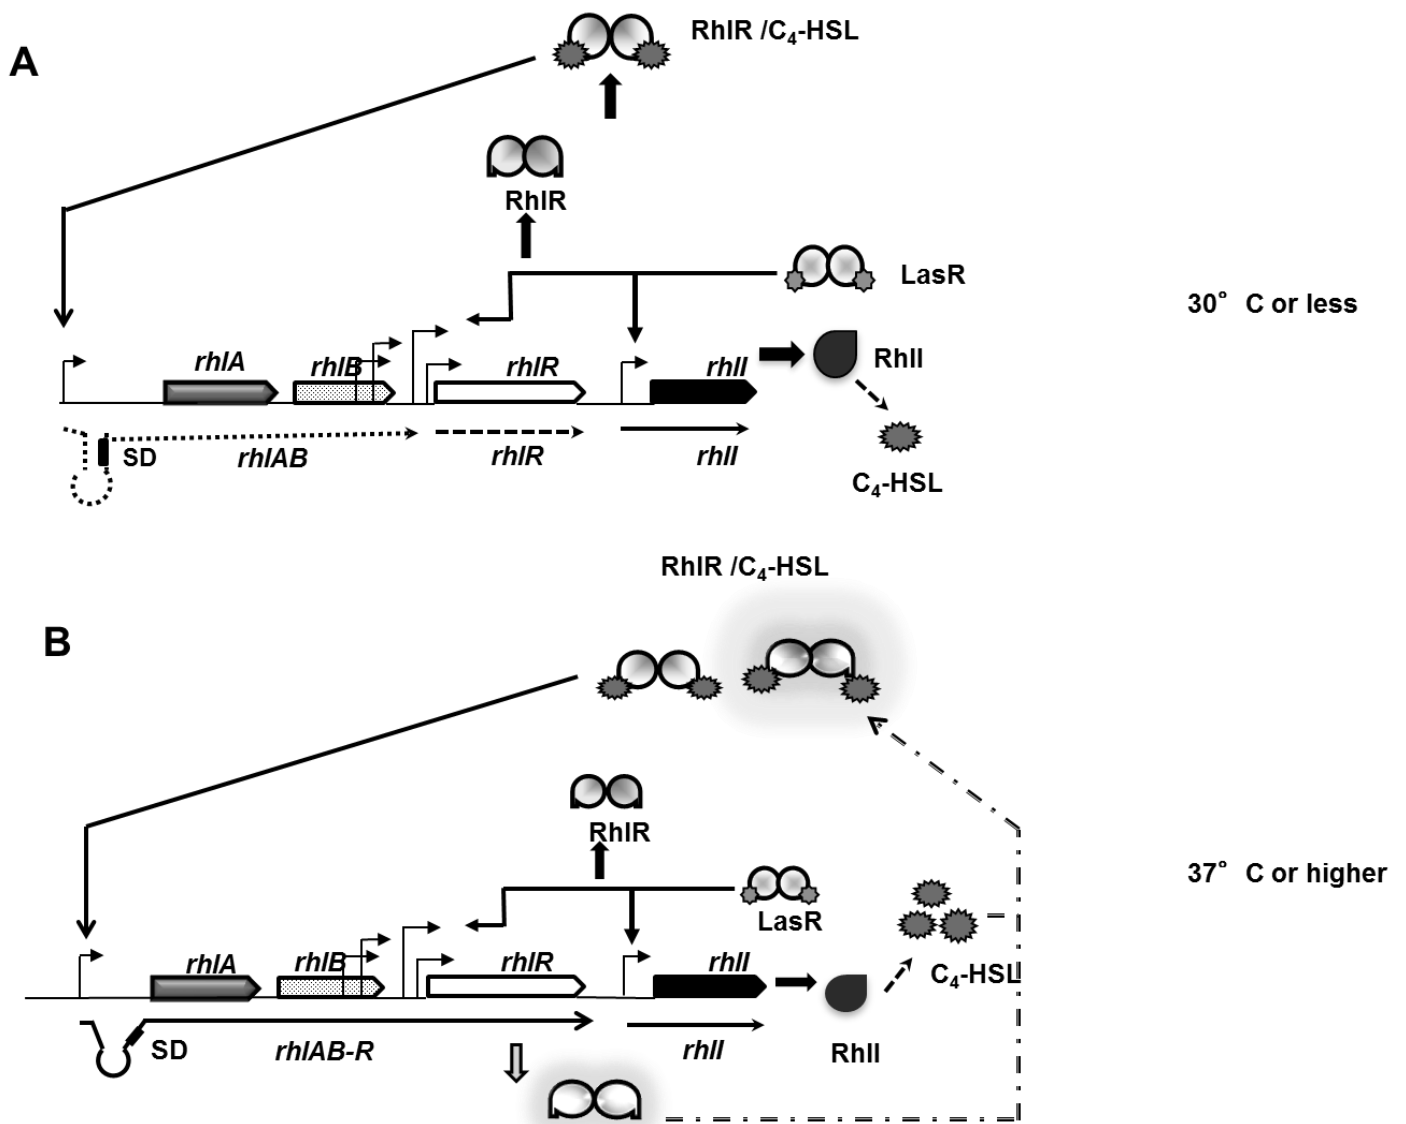

**Figure S1.** Schematic representation of *rhIR* transcriptional regulation from its five promoters and the role of the ROSE-element at 5' *rhIA* UTR in the autoregulatory loop present at 37 °C. Panel A shows the pattern of expression at 30 °C or lower, where the structure formed by the ROSE-element blocks the *rhIA* Shine-Dalgarno (SD) sequence. Panel B represents the expression of the *rhIAB-R* operon at 37 °C or higher that results in an increased RhIR concentration due to the instability of the ROSE-element at this temperature and the exposure of the *rhIA* SD sequence.

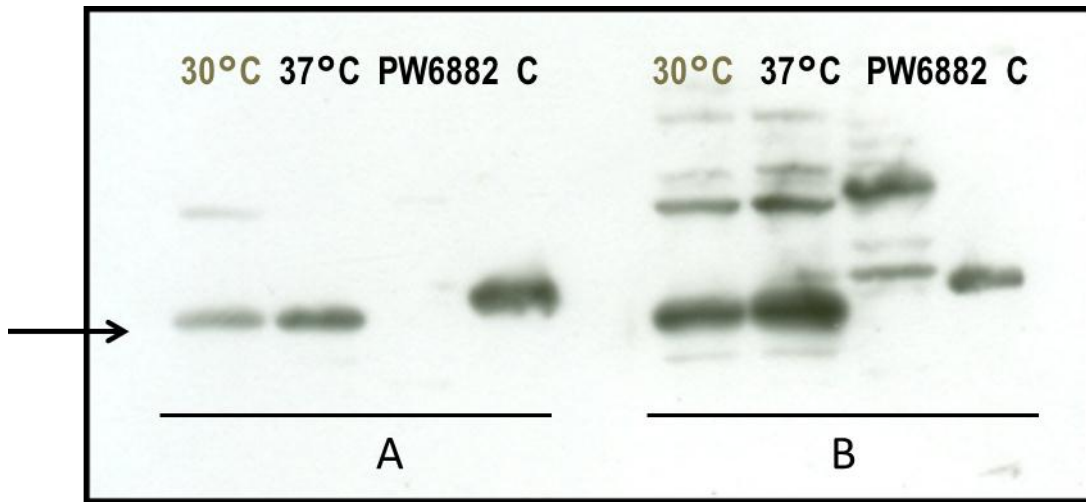

**Figure S2.** Effect of growth-temperature on RhIA intracellular concentration (30 °C and 37 °C) determined by western blot. RhIA concentration in extracts of PAO1 was determined from cells grown to an OD<sub>600</sub> of 1.5 in PPGAS medium at 30 °C and 37 °C. Panels A and B correspond to two separate determinations. The same amount of proteins was used in the case negative control [*P. aeruginosa* strain PW6882 which is an *rhIR* mutant]. Positive control (C) [*E. coli* (pET28RhIA)].

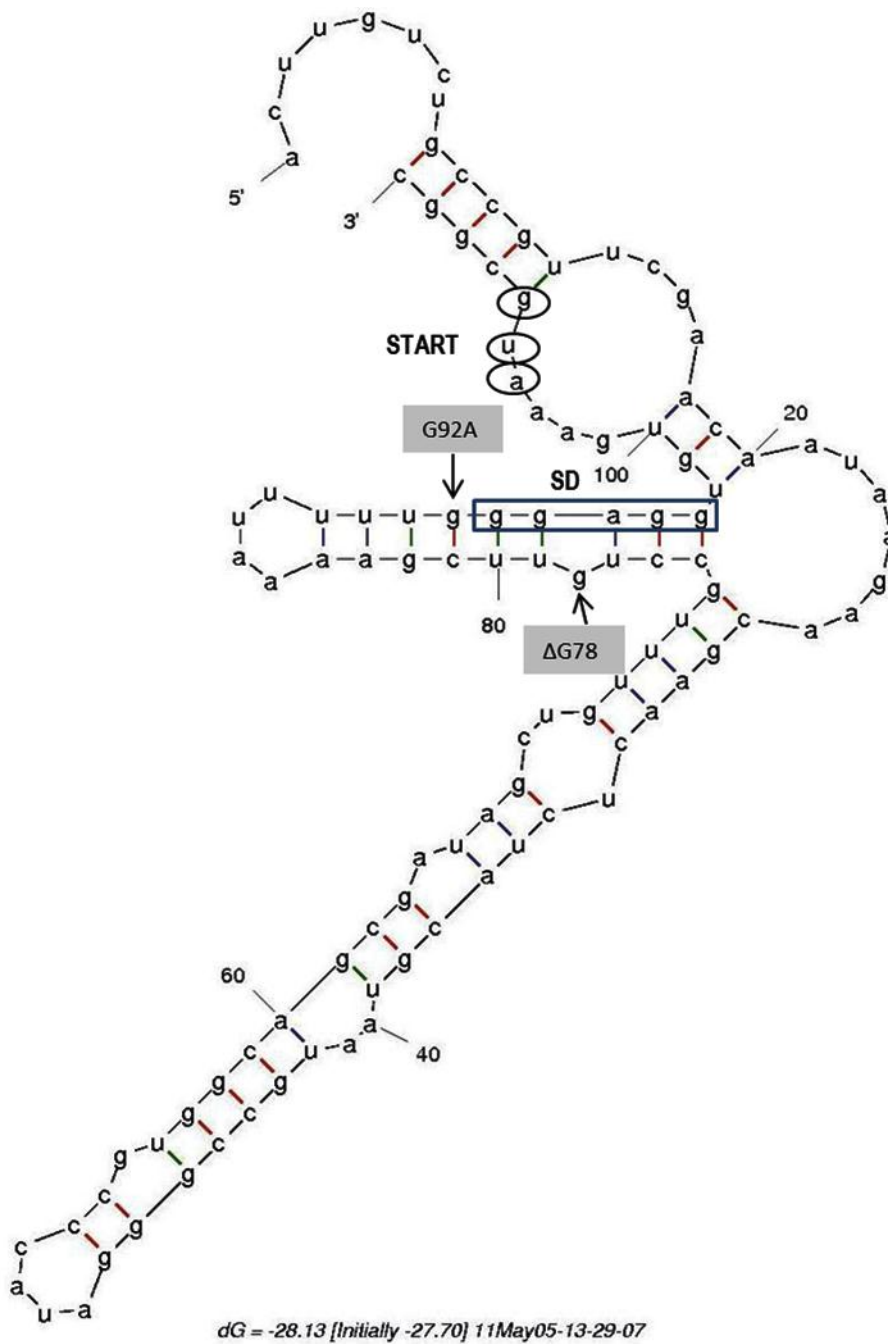

**Figure S3A.** Secondary structure of the ROSE element present in the 5' UTR of *rhlA*. The Shine-Dalgarno sequence (SD) and the translation start site (START) are shown. Mutations are described in the text.

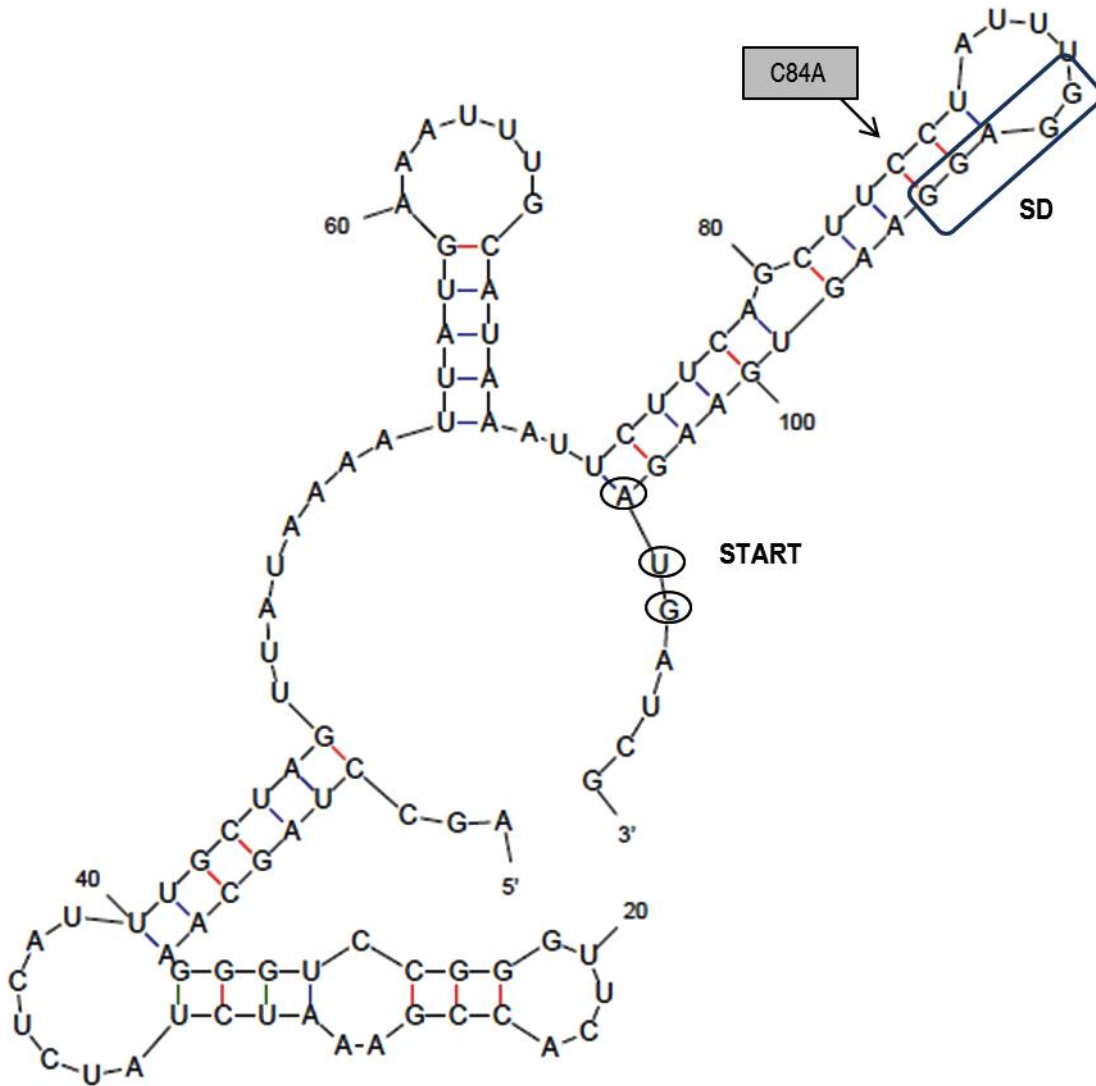

dG = -27.60 [Initially -27.60] 12Oct04-21-45-41

**Figure S3B.** Secondary structure of ROSE-like element present in the 5' UTR of *lasI*. The Shine-Dalgarno sequence (SD) and the translation start site (START) are shown. Mutations are described in the text.

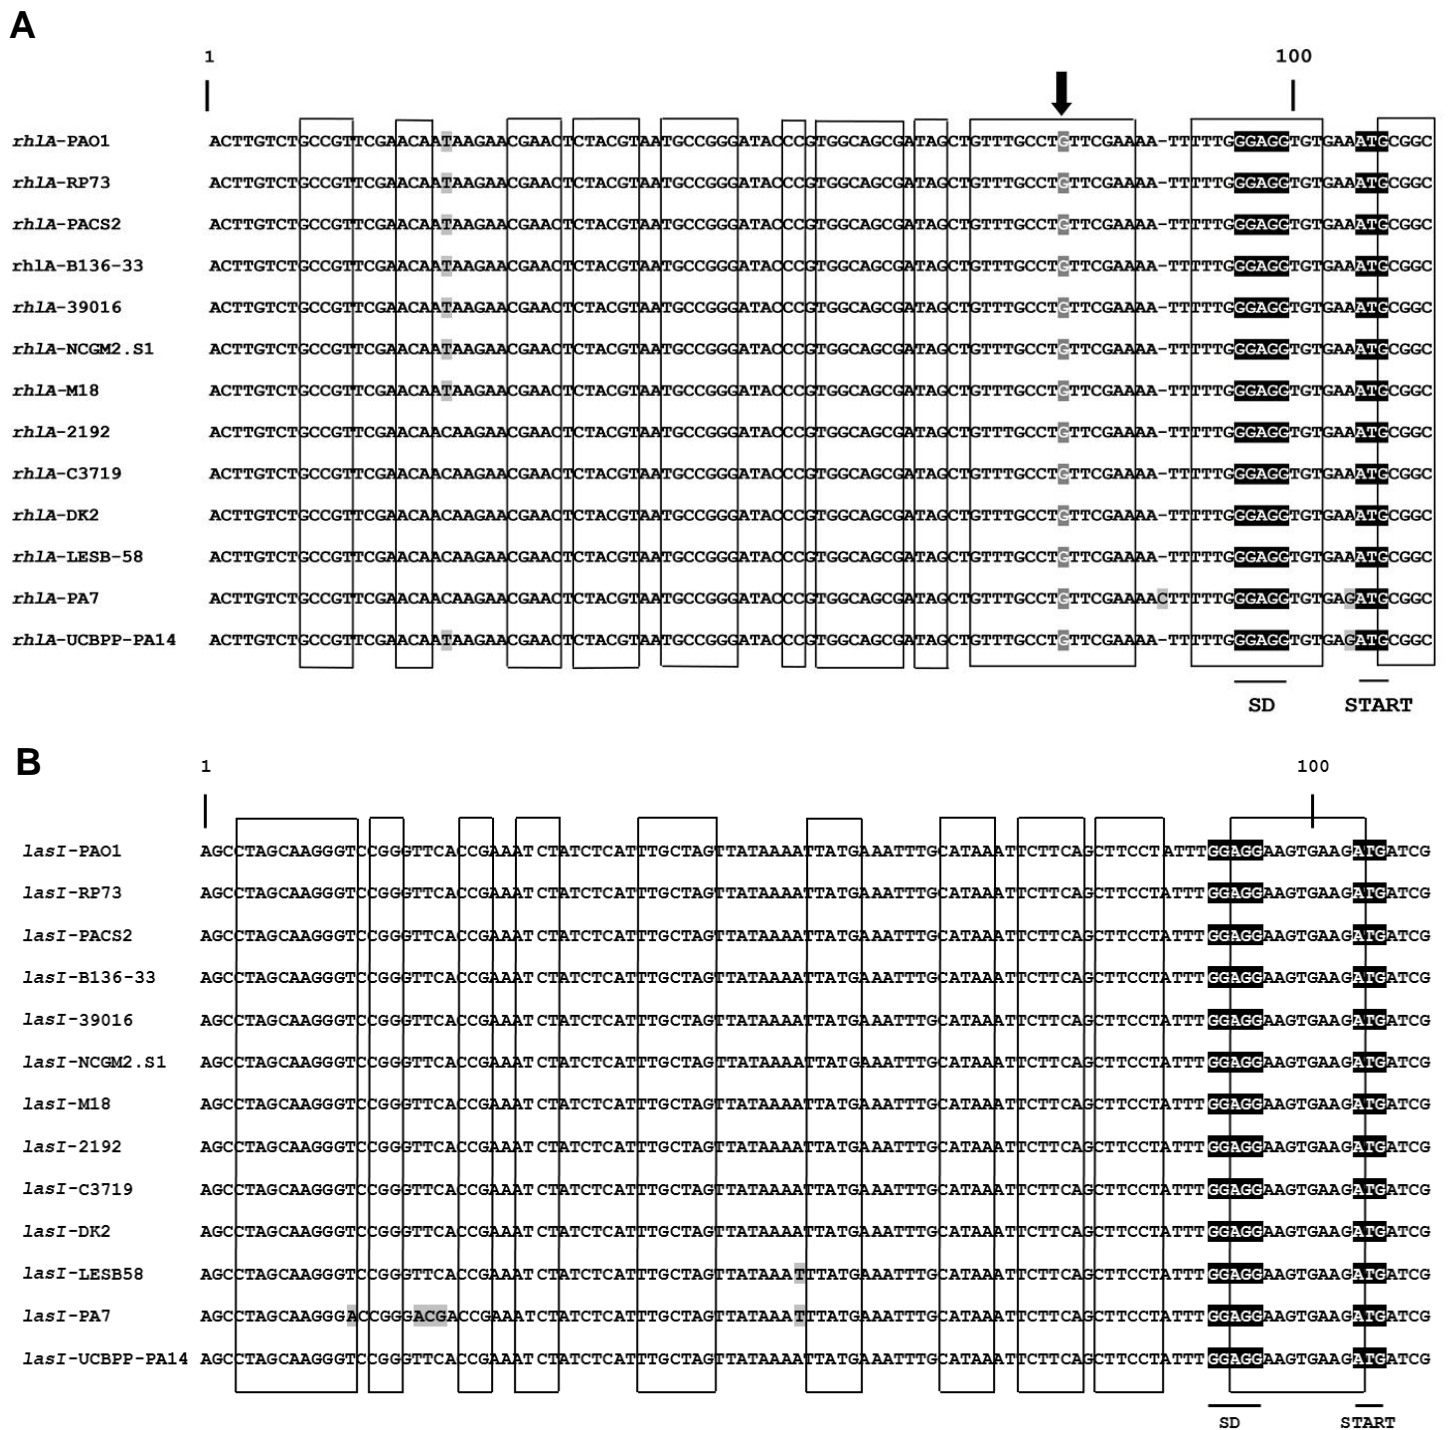

**Figure S4.** Alignment of the ROSE-like elements presents in the 5' UTR of *rhIA* (A) and *lasI* (B) in *P. aeruginosa* strains. The Shine-Dalgarno sequences (SD) and the translation start sites (START) are indicated. Boxes in the alignment mark regions involved in base pairing in the secondary structure prediction. The conserved G residue opposite to the SD sequence in the 5' UTR of *rhIA* is shaded and indicated by a filled arrow. Non-conserved residues in the alignment are shaded.

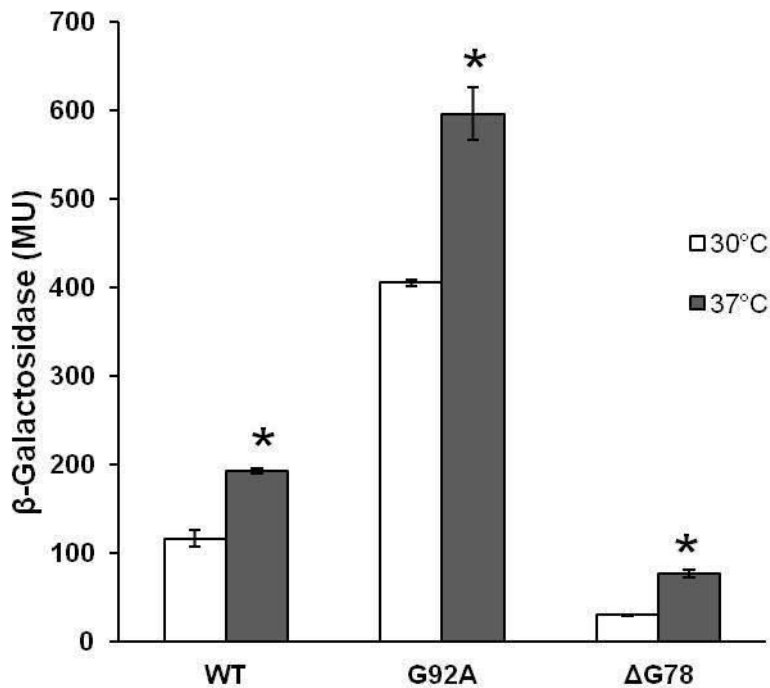

**Figure S5.** Characterization of the effect of RNA-thermometers present in the 5' UTR of *rhIA* in thermoregulation of gene expression.  $\beta$ -galactosidase activity levels of cells harboring plasmids with different versions of the complete 5'-UTR of *rhIA* fused to *lacZ* (pBOC-*rhIA*). Cells of *E. coli* DH5 $\alpha$  transformed with the corresponding plasmids, were grown at 30 °C in LB until exponential phase (optical density of 0.5 at 600 nm). After addition of 0.04% L-arabinose, half of the culture was maintained at 30 °C (white bars) and the other half was transferred to 37 °C (grey bars) for 60 minutes before measuring  $\beta$ -galactosidase activity. An asterisk (\*) indicates a value of  $P < 0.05$  by Student's t test.

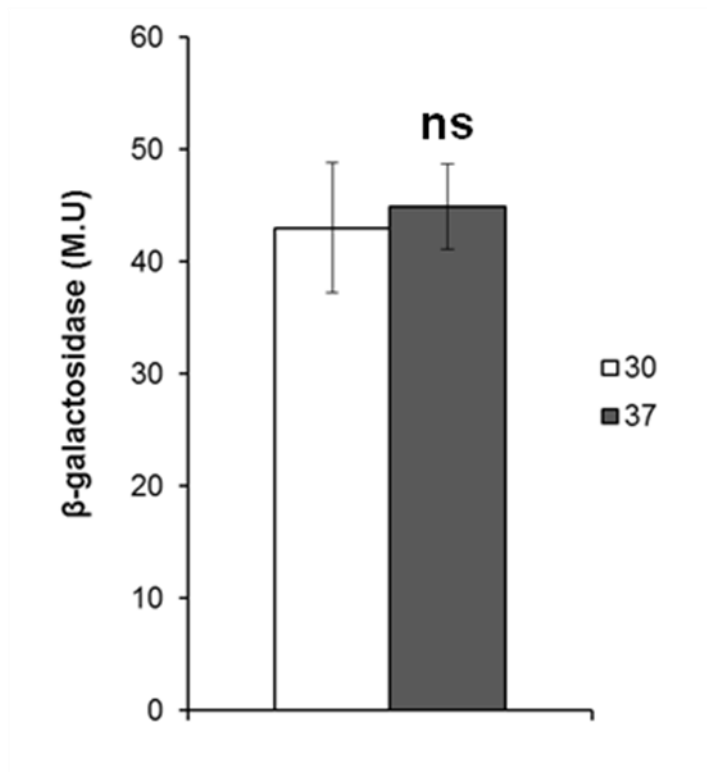

**Figure S6.** Characterization of the effect of the sequence present in the 5' UTR of *lasR* in thermoregulation of gene expression.  $\beta$ -galactosidase activity levels of cells harboring plasmid pBOC-*lasR*. Cells were grown as described for pBOC-*rhA*, except that L-arabinose addition was 0.01%. An asterisk (\*) indicates a value of  $P < 0.05$  by Student's t test; ns, means not significant.

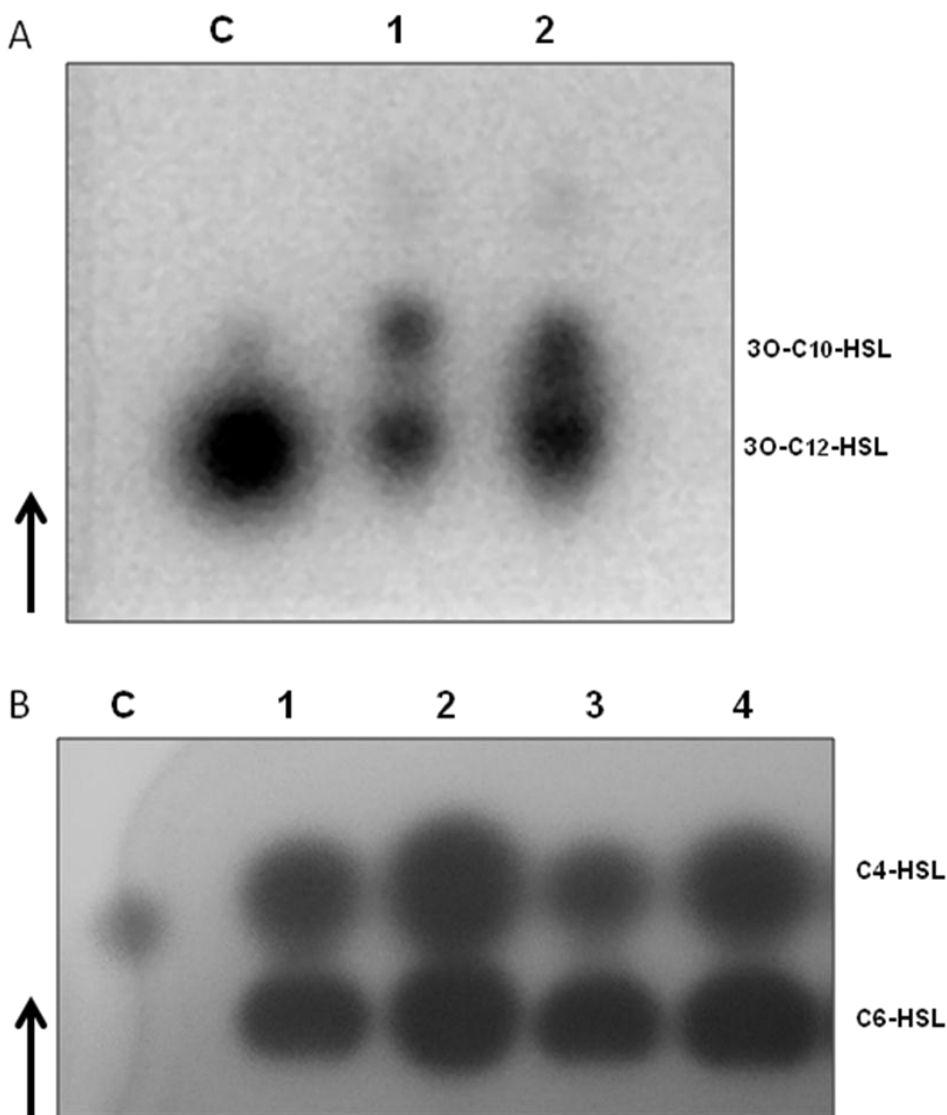

**Figure S7.** Temperature effect on autoinducers production by *P. aeruginosa* PAO1 and its *rhIR* mutant. In (A), the silica TLC plate was run in 60% methanol for 4 h and overlaid after chromatography with the long-chain AHL biosensor *E. coli* (pSB1075) and in (B) the plate was overlaid after chromatography with the short chain AHL biosensor *C. violaceum* CV026. (A) Lanes: C, positive control 3-oxo-C12-HSL (5 $\mu$ l of 10 mM standard); 1 and 2, extracts from cultures in PPGAS at 30°C and 37°C respectively. (B) Lanes: C, positive control C4-HSL (5  $\mu$ l of 100 mM standard); 1 and 2, extracts from PAO1 cultures in PPGAS at 30 °C and 37 °C for 24 h, respectively; 3 and 4, extracts from cultures of *rhIR* mutant (PW6882) in PPGAS at 30 °C and 37 °C for 24 h, respectively. Direction of solvent migration is marked with an arrow.



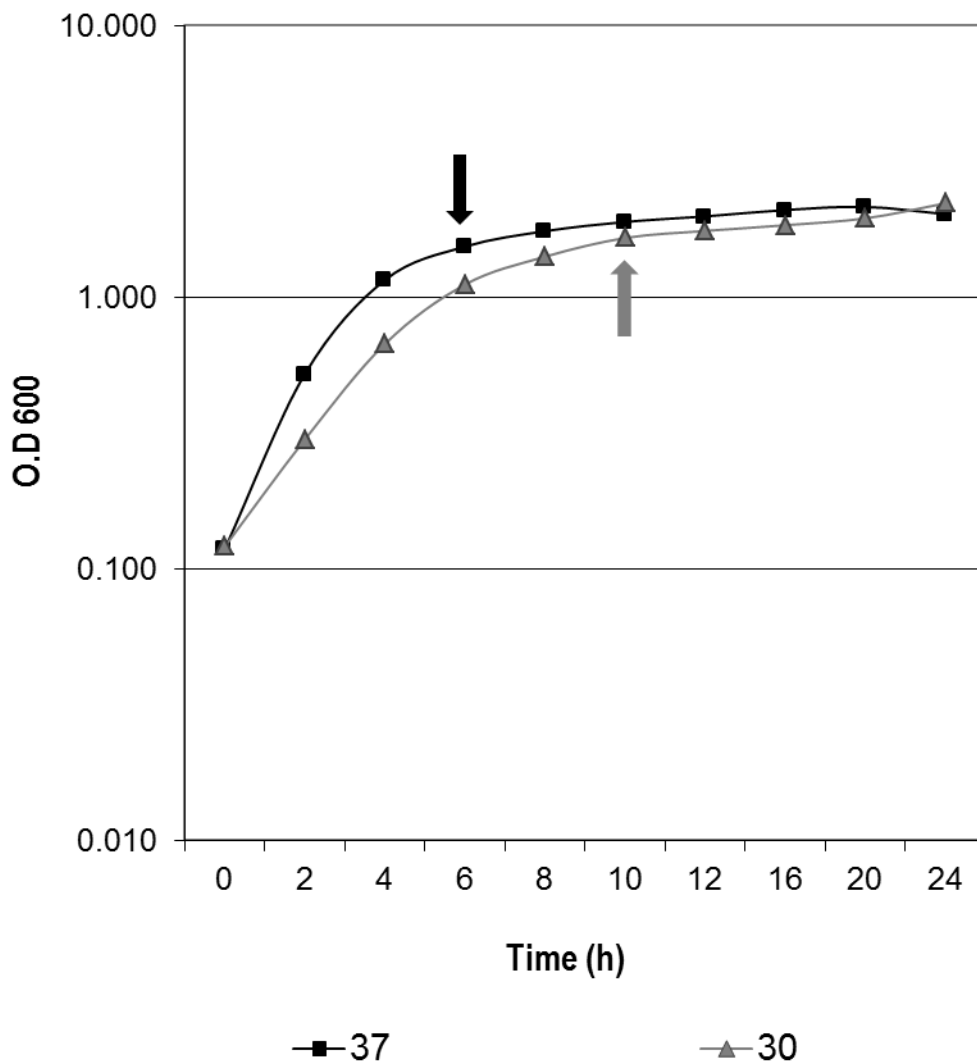

**Figure S8.** Growth-curve of *P. aeruginosa* PAO1 cultured at 30 °C and 37 °C in PPGAS medium. Arrows show the point where cultures reach an OD<sub>600</sub> of 1.5.

**Table S1.** Bacterial strains and plasmids used in this work.

| Bacterial strain or plasmid   | Relevant characteristics                                                                                                                                                                                       | Reference  |
|-------------------------------|----------------------------------------------------------------------------------------------------------------------------------------------------------------------------------------------------------------|------------|
| <i>E. coli</i>                |                                                                                                                                                                                                                |            |
| DH5 $\alpha$                  | $\phi 80\Delta lacZ\Delta M15\Delta [lacZYA-argF]JU169 endA recA1 hsdR17 deoR thi-1 supE44$                                                                                                                    | Invitrogen |
| IBEC58                        | <i>gyrA96 relA1 <math>\Delta dam \Delta dcm \Delta hsdRMS</math></i> derivative of BW25113. No DNA methylation                                                                                                 | 8          |
| <i>C. violaceum</i>           |                                                                                                                                                                                                                |            |
| CV026                         | Double mini-Tn5 mutant derived from ATCC 31532, Kan <sup>R</sup> , Hg <sup>R</sup> , <i>cvil::Tn5 xyIE, Str<sup>R</sup></i><br>AHL biosensor, produces violacein pigment only in the presence of exogenous AHL | 17         |
| <i>P. aeruginosa</i>          |                                                                                                                                                                                                                |            |
| PAO1                          | Wild type strain of the MPAO1 subline                                                                                                                                                                          | 21         |
| <i>rhIA::Gm</i>               | PAO1 derived <i>rhIA</i> : : $\Omega$ mutant, Gm <sup>r</sup>                                                                                                                                                  | 22         |
| PW6882                        | PAO1 <i>rhIR</i> : : Tn9lacZ mutant                                                                                                                                                                            | 21         |
| PW8143                        | PAO1 <i>phzA1::ISphoA/hah</i> mutant                                                                                                                                                                           | 21         |
| Plasmids                      |                                                                                                                                                                                                                |            |
| pLP170                        | <i>lacZ</i> transcriptional fusion vector that contains an origin of replication for both <i>P. aeruginosa</i> and <i>E.coli</i> , Ap <sup>R</sup> , Cb <sup>R</sup>                                           | 23         |
| pMP220                        | Broad-host-range, low-copy-number promoter-probe vector; IncP replicon, <i>lacZ</i> Tc <sup>R</sup> Tra-                                                                                                       | 5          |
| pPCS1002                      | <i>rhIR</i> promoter region (nt -500 to +242) cloned in pLP170 to create a <i>rhIR</i> '- <i>lacZ</i> transcriptional fusion                                                                                   | 23         |
| pLECA-70                      | <i>lecA</i> promoter region (nt -445 to +63) cloned in pLP170 to create a <i>lecA</i> '- <i>lacZ</i> transcriptional fusion                                                                                    | This study |
| pHZA1-20                      | <i>phzM</i> (divergent to <i>phzA1</i> ) coding region (nt + 244) and -696 to +81 pb of <i>phzA1</i> gene cloned in pMP220 to create <i>phzA1</i> '- <i>lacZ</i> transcriptional fusion                        | This study |
| pMPCG                         | 0.8-kb <i>HindIII-BamHI</i> fragment from plasmid pUO58 containing the <i>rhIAB</i> promoter cloned in pMP220 to create an <i>rhIA</i> '- <i>lacZ</i> transcriptional fusion                                   | 24         |
| pUCP20                        | Expression vector with plac able to replicate in <i>P. aeruginosa</i> and <i>E.coli</i> ; Ap <sup>R</sup> , Cb <sup>R</sup>                                                                                    | 25         |
| pGMYC                         | <i>plac-rhIR</i> cloned on pUCP20                                                                                                                                                                              | 24         |
| pSB1075                       | <i>lasRlasI'</i> ( <i>P. aeruginosa</i> PAO1):: <i>luxCDABE</i> ( <i>Photorhabdus luminescens</i> [ATCC 29999]) fusion in pUC18 AmpR, AHL biosensor producing bioluminescence                                  | 18         |
| pBAD18- <i>lacZ</i> 481       | Translational <i>lacZ</i> fusion vector, Apr                                                                                                                                                                   | 26         |
| pBO- <i>rhIA</i>              | <i>P. aeruginosa rhIA</i> small ROSE element (nt 74 to 109) fusion in pBAD18lacZ481                                                                                                                            | This study |
| pBO- <i>rhIA</i> [\u0394G78]  | <i>P. aeruginosa rhIA</i> \u0394G78 ROSE element (nt 74 to 109) fusion in pBAD18lacZ481                                                                                                                        | This study |
| pBO- <i>rhIA</i> [G92A]       | <i>P. aeruginosa rhIA</i> G92A ROSE element (nt 74 to 109) fusion in pBAD18lacZ481                                                                                                                             | This study |
| pBOC- <i>rhIA</i>             | <i>P. aeruginosa rhIA</i> ROSE element (nt 1 to 109) fusion in pBAD18lacZ481                                                                                                                                   | This study |
| pBOC- <i>rhIA</i> [\u0394G78] | <i>P. aeruginosa rhIA</i> \u0394G78 ROSE element (nt 1 to 109) fusion in pBAD18lacZ481                                                                                                                         | This study |
| pBOC- <i>rhIA</i> [G92A]      | <i>P. aeruginosa rhIA</i> G92A ROSE element (nt 1 to 109) fusion in pBAD18lacZ481                                                                                                                              | This study |
| pBO- <i>rhIA, rhIB</i>        | <i>P. aeruginosa rhIA</i> coding region with small version of the ROSE element cloned in frame with <i>lacZ</i> . Fusion starts with the AUG codon of <i>rhIB</i> in pBAD18lacZ481                             | This study |
| pBO-\u0394 <i>rhIA, rhIB</i>  | pBO- <i>rhIA, rhIB</i> with a deletion of an internal <i>rhIA</i> fragment (nt +548 to +874)                                                                                                                   | This study |
| pBOC- <i>lasI</i>             | <i>P. aeruginosa lasI</i> ROSE-like element (nt 1 to 109) fusion in pBAD18lacZ481                                                                                                                              | This study |
| pBOC- <i>lasI</i> [C84A]      | <i>P. aeruginosa lasI</i> C84A ROSE-like element (nt 1 to 109) fusion in pBAD18lacZ481                                                                                                                         | This study |
| pBOC- <i>gyrA</i>             | <i>E. coli gyrA</i> fusion in pBAD18lacZ481                                                                                                                                                                    | 9          |
| pBOC- <i>lasR</i>             | <i>P. aeruginosa lasR</i> 5' UTR (nt 1 to 110) fusion in pBAD18lacZ481                                                                                                                                         | This study |

**Table S2.** Transcripts which were differentially regulated at 25°C and 37°C in PAO1, grown in PPGAS media (>1.4-fold).

| ORF    | Gene        | Gene product <sup>a</sup>                              | p-value<br>(37 vs. 25) | Fold-Change<br>(37 vs. 25) |
|--------|-------------|--------------------------------------------------------|------------------------|----------------------------|
| PA0672 | <i>hemO</i> | heme oxygenase                                         | 1.84E-06               | 1.55                       |
| PA4221 | <i>fptA</i> | Fe(III)-pyochelin outer membrane receptor precursor    | 3.46E-06               | 4.90                       |
| PA4225 | <i>pchF</i> | pyochelin synthetase                                   | 3.84E-06               | 3.40                       |
| PA4222 |             | probable ATP-binding component of ABC transporter      | 4.33E-06               | 3.15                       |
| PA4224 | <i>pchG</i> | pyochelin biosynthetic protein PchG                    | 7.05E-06               | 4.20                       |
| PA3815 | <i>iscR</i> | iron-sulfur cluster assembly transcription factor IscR | 8.79E-06               | 2.88                       |
| PA4843 |             | probable two-component response regulator              | 9.34E-06               | 1.66                       |
| PA2588 |             | probable transcriptional regulator                     | 1.03E-05               | 1.95                       |
| PA4223 |             | probable ATP-binding component of ABC transporter      | 1.32E-05               | 2.71                       |
| PA4156 |             | probable TonB-dependent receptor                       | 1.38E-05               | 2.45                       |
| PA4218 | <i>ampP</i> | siderophore transporter                                | 1.70E-05               | 3.50                       |
| PA4220 |             | hypothetical protein                                   | 1.88E-05               | 4.40                       |
| PA3572 |             | hypothetical protein                                   | 2.20E-05               | -1.56                      |
| PA0614 |             | hypothetical protein                                   | 2.57E-05               | -1.61                      |
| PA2483 |             | conserved hypothetical protein                         | 3.98E-05               | 1.50                       |
| PA1911 | <i>femR</i> | sigma factor regulator, FemR                           | 4.18E-05               | 1.41                       |
| PA0044 | <i>exoT</i> | exoenzyme T                                            | 4.27E-05               | 1.55                       |
| PA1300 |             | probable sigma-70 factor, ECF subfamily                | 5.62E-05               | 1.84                       |
| PA4726 | <i>cbrB</i> | two-component response regulator CbrB                  | 7.75E-05               | 1.42                       |
| PA4226 | <i>pchE</i> | dihydroaeruginosic acid synthetase                     | 8.79E-05               | 3.33                       |
| PA3009 |             | hypothetical protein                                   | 9.70E-05               | 1.47                       |
| PA1912 | <i>femI</i> | ECF sigma factor, FemI                                 | 1.06E-04               | 1.73                       |
| PA1711 | <i>exsE</i> | hypothetical protein                                   | 1.21E-04               | 1.57                       |
| PA1151 | <i>imm2</i> | pyocin S2 immunity protein                             | 1.43E-04               | 1.83                       |
| PA3530 | <i>bfd</i>  | conserved hypothetical protein                         | 1.46E-04               | 1.62                       |

Table S2. Cont.

| ORF    | Gene               | Gene product <sup>a</sup>                              | p-value<br>(37 vs. 25) | Fold-Change<br>(37 vs. 25) |
|--------|--------------------|--------------------------------------------------------|------------------------|----------------------------|
| PA4219 | <i>ampO</i>        | hypothetical protein                                   | 1.46E-04               | 1.65                       |
| PA3813 | <i>iscU</i>        | probable iron-binding protein IscU                     | 1.59E-04               | 2.06                       |
| PA2030 |                    | hypothetical protein                                   | 1.59E-04               | 2.01                       |
| PA5531 | <i>tonB</i>        | TonB protein                                           | 1.61E-04               | 2.34                       |
| PA0471 |                    | conserved hypothetical protein                         | 1.65E-04               | 1.50                       |
| PA4896 |                    | probable sigma-70 factor, ECF subfamily                | 1.89E-04               | 1.45                       |
| PA0665 |                    | conserved hypothetical protein                         | 2.57E-04               | 2.49                       |
| PA4217 | <b><i>phzS</i></b> | <b>flavin-containing monooxygenase</b>                 | <b>2.81E-04</b>        | <b>3.59</b>                |
| PA1847 | <i>nfuA</i>        | hypothetical protein                                   | 3.31E-04               | 2.56                       |
| PA0810 |                    | probable haloacid dehalogenase                         | 3.54E-04               | -1.44                      |
| PA3814 | <i>iscS</i>        | L-cysteine desulfurase (pyridoxal phosphate-dependent) | 3.73E-04               | 1.79                       |
| PA4231 | <i>pchA</i>        | salicylate biosynthesis isochorismate synthase         | 4.06E-04               | 3.24                       |
| PA0270 |                    | hypothetical protein                                   | 4.70E-04               | 1.53                       |
| PA0941 |                    | hypothetical protein                                   | 4.77E-04               | 1.40                       |
| PA1432 | <b><i>lasI</i></b> | <b>autoinducer synthesis protein LasI</b>              | <b>5.26E-04</b>        | <b>2.62</b>                |
| PA3662 |                    | hypothetical protein                                   | 5.65E-04               | 1.96                       |
| PA5346 | <i>sadB</i>        | Predicted signal transduction protein                  | 6.19E-04               | 1.75                       |
| PA3600 |                    | conserved hypothetical protein                         | 6.29E-04               | 1.70                       |
| PA1169 |                    | probable lipoxygenase                                  | 6.95E-04               | -1.54                      |
| PA4142 | <i>rpmJ</i>        | 50S ribosomal protein L36                              | 7.64E-04               | 1.65                       |
| PA4324 |                    | hypothetical protein                                   | 9.08E-04               | 1.85                       |
| PA1708 | <i>popB</i>        | translocator protein PopB                              | 9.53E-04               | 2.01                       |
| PA3617 | <i>recA</i>        | RecA protein                                           | 9.78E-04               | 1.42                       |
| PA3529 |                    | alkylhydroperoxide reductase C                         | 1.05E-03               | 3.23                       |
| PA0436 |                    | probable transcriptional regulator                     | 1.05E-03               | 1.51                       |
| PA2034 |                    | hypothetical protein                                   | 1.06E-03               | 1.86                       |

Table S2. Cont.

| ORF    | Gene         | Gene product <sup>a</sup>                                      | p-value<br>(37 vs. 25) | Fold-Change<br>(37 vs. 25) |
|--------|--------------|----------------------------------------------------------------|------------------------|----------------------------|
| PA5481 |              | hypothetical protein                                           | 1.10E-03               | -5.16                      |
| PA3972 |              | probable acyl-CoA dehydrogenase                                | 1.17E-03               | 1.90                       |
| PA3183 | <i>zwf</i>   | glucose-6-phosphate 1-dehydrogenase                            | 1.21E-03               | 1.50                       |
| PA3601 |              | conserved hypothetical protein                                 | 1.42E-03               | 3.96                       |
| PA0505 |              | hypothetical protein                                           | 1.58E-03               | 1.83                       |
| PA5499 | <i>np20</i>  | transcriptional regulator np20                                 | 1.61E-03               | 1.59                       |
| PA4230 | <i>pchB</i>  | salicylate biosynthesis protein PchB                           | 1.63E-03               | 3.62                       |
| PA0269 |              | conserved hypothetical protein                                 | 1.66E-03               | 2.07                       |
| PA5276 | <i>lppL</i>  | Lipopeptide LppL precursor                                     | 1.72E-03               | 1.42                       |
| PA2401 | <i>pvdJ</i>  | Non-ribosomal peptide synthetase                               | 1.80E-03               | 1.69                       |
| PA4570 |              | hypothetical protein                                           | 1.91E-03               | 2.08                       |
| PA4525 | <i>pilA</i>  | type 4 fimbrial precursor PilA                                 | 2.38E-03               | 2.14                       |
| PA4470 | <i>fumC1</i> | fumarate hydratase                                             | 2.40E-03               | 2.23                       |
| PA1905 |              | <b><i>phzG2</i> probable pyridoxamine 5'-phosphate oxidase</b> | <b>2.59E-03</b>        | <b>3.00</b>                |
| PA4141 |              | hypothetical protein                                           | 2.63E-03               | 3.06                       |
| PA3841 | <i>exoS</i>  | exoenzyme S                                                    | 2.77E-03               | 1.53                       |
| PA4251 | <i>rplE</i>  | 50S ribosomal protein L5                                       | 2.86E-03               | 1.66                       |
| PA0336 | <i>ygdP</i>  | Nudix hydrolase YgdP                                           | 2.96E-03               | 1.52                       |
| PA2031 |              | hypothetical protein                                           | 3.33E-03               | 2.12                       |
| PA0050 |              | hypothetical protein                                           | 3.52E-03               | -1.53                      |
| PA0200 |              | hypothetical protein                                           | 3.71E-03               | -2.35                      |
| PA5339 |              | conserved hypothetical protein                                 | 3.90E-03               | 1.55                       |
| PA3441 |              | probable molybdopterin-binding protein                         | 3.97E-03               | 1.61                       |
| PA3973 |              | probable transcriptional regulator                             | 4.09E-03               | 2.53                       |
| PA1168 |              | hypothetical protein                                           | 4.19E-03               | -2.82                      |
| PA0456 |              | probable cold-shock protein                                    | 4.47E-03               | 1.85                       |

Table S2. Cont.

| ORF     | Gene               | Gene product <sup>a</sup>                            | p-value<br>(37 vs. 25) | Fold-Change<br>(37 vs. 25) |
|---------|--------------------|------------------------------------------------------|------------------------|----------------------------|
| PA2575  |                    | hypothetical protein                                 | 4.54E-03               | 1.67                       |
| PA3182  | <i>pgl</i>         | 6-phosphogluconolactonase                            | 4.62E-03               | 1.75                       |
| PA4155  |                    | hypothetical protein                                 | 4.88E-03               | 1.92                       |
| PA2400  | <i>pvdJ</i>        | Non-ribosomal peptide synthetase                     | 5.10E-03               | 2.02                       |
| PA1747  |                    | hypothetical protein                                 | 5.19E-03               | 1.40                       |
| PA1749  |                    | hypothetical protein                                 | 5.74E-03               | 1.43                       |
| PA2742  | <i>rpmI</i>        | 50S ribosomal protein L35                            | 5.86E-03               | 1.52                       |
| PA3014  | <i>faoA</i>        | fatty-acid oxidation complex alpha-subunit           | 6.81E-03               | -1.44                      |
| PA0263  | <i>hcpA</i>        | secreted protein Hcp                                 | 7.19E-03               | -2.25                      |
| PA0872t | <i>phhA</i>        | phenylalanine-4-hydroxylase                          | 7.26E-03               | 2.62                       |
| PA5170  | <i>arcD</i>        | arginine/ornithine antiporter                        | 7.26E-03               | -2.09                      |
| PA2009  | <i>hmgA</i>        | homogentisate 1,2-dioxygenase                        | 7.39E-03               | 1.58                       |
| PA4615  |                    | probable oxidoreductase                              | 7.45E-03               | 1.67                       |
| PA0870  | <i>phhC</i>        | aromatic amino acid aminotransferase                 | 8.06E-03               | 1.48                       |
| PA3880  |                    | conserved hypothetical protein                       | 8.24E-03               | -1.69                      |
| PA0296  | <i>spul</i>        | Glutamylpolyamine synthetase                         | 8.39E-03               | 1.45                       |
| PA4209  | <b><i>phzM</i></b> | <b>probable phenazine-specific methyltransferase</b> | <b>8.95E-03</b>        | <b>1.47</b>                |
| PA2411  |                    | probable thioesterase                                | 9.06E-03               | 1.74                       |
| PA5429  | <i>aspA</i>        | aspartate ammonia-lyase                              | 9.26E-03               | 1.46                       |
| PA1677  |                    | conserved hypothetical protein                       | 9.30E-03               | 1.62                       |
| PA3812  | <i>iscA</i>        | probable iron-binding protein IscA                   | 9.54E-03               | 1.83                       |
| PA2033  |                    | hypothetical protein                                 | 1.01E-02               | 2.07                       |
| PA1148  | <i>toxA</i>        | exotoxin A precursor                                 | 1.04E-02               | -1.45                      |
| PA2399  | <i>pvdD</i>        | pyoverdine synthetase D                              | 1.06E-02               | 1.77                       |
| PA4229  | <i>pchC</i>        | pyochelin biosynthetic protein PchC                  | 1.08E-02               | 2.26                       |
| PA1802  | <i>clpX</i>        | ATP-dependent Clp protease ATP-binding subunit ClpX  | 1.11E-02               | 1.64                       |

Table S2. Cont.

| ORF    | Gene         | Gene product <sup>a</sup>                  | p-value<br>(37 vs. 25) | Fold-Change<br>(37 vs. 25) |
|--------|--------------|--------------------------------------------|------------------------|----------------------------|
| PA4471 | <i>lldD</i>  | L-lactate dehydrogenase                    | 1.12E-02               | 2.27                       |
| PA3361 | <i>lecB</i>  | fucose-binding lectin PA-III               | 1.12E-02               | 2.20                       |
| PA2405 |              | hypothetical protein                       | 1.13E-02               | 1.52                       |
| PA2402 |              | probable non-ribosomal peptide synthetase  | 1.14E-02               | 1.92                       |
| PA3181 |              | 2-keto-3-deoxy-6-phosphogluconate aldolase | 1.15E-02               | 1.47                       |
| PA3195 | <i>gapA</i>  | glyceraldehyde 3-phosphate dehydrogenase   | 1.20E-02               | 1.79                       |
| PA4250 | <i>rpsN</i>  | 30S ribosomal protein S14                  | 1.27E-02               | 1.57                       |
| PA2412 |              | conserved hypothetical protein             | 1.31E-02               | 2.21                       |
| PA2377 |              | hypothetical protein                       | 1.40E-02               | -2.91                      |
| PA4254 | <i>rpsQ</i>  | 30S ribosomal protein S17                  | 1.49E-02               | 1.60                       |
| PA1244 |              | hypothetical protein                       | 1.56E-02               | 2.08                       |
| PA2015 | <i>gnyD</i>  | Citronelloyl-CoA dehydrogenase, GnyD       | 1.58E-02               | 1.45                       |
| PA4139 |              | hypothetical protein                       | 1.61E-02               | -2.53                      |
| PA2880 |              | hypothetical protein                       | 1.61E-02               | 1.63                       |
| PA1914 |              | conserved hypothetical protein             | 1.61E-02               | -2.32                      |
| PA1895 |              | hypothetical protein                       | 1.68E-02               | -1.56                      |
| PA2427 |              | hypothetical protein                       | 1.68E-02               | 1.75                       |
| PA1875 |              | probable outer membrane protein precursor  | 1.71E-02               | -1.44                      |
| PA4264 | <i>rpsJ</i>  | 30S ribosomal protein S10                  | 1.77E-02               | 1.50                       |
| PA4253 | <i>rplN</i>  | 50S ribosomal protein L14                  | 1.77E-02               | 1.47                       |
| PA4751 | <i>ftsH</i>  | cell division protein FtsH                 | 1.78E-02               | 1.45                       |
| PA2743 | <i>infC</i>  | translation initiation factor IF-3         | 1.79E-02               | 1.71                       |
| PA0713 |              | hypothetical protein                       | 1.80E-02               | 1.84                       |
| PA5100 | <i>hutU</i>  | urocanase                                  | 1.82E-02               | 1.60                       |
| PA2016 | <i>gnyR</i>  | Regulatory gene of gnyRDBHAL cluster, GnyR | 1.85E-02               | 1.83                       |
| PA3407 | <i>hasAp</i> | heme acquisition protein HasAp             | 1.86E-02               | 1.54                       |

Table S2. Cont.

| ORF    | Gene               | Gene product <sup>a</sup>              | p-value<br>(37 vs. 25) | Fold-Change<br>(37 vs. 25) |
|--------|--------------------|----------------------------------------|------------------------|----------------------------|
| PA4917 |                    | hypothetical protein                   | 2.32E-02               | 1.44                       |
| PA2604 |                    | conserved hypothetical protein         | 2.31E-02               | 1.56                       |
| PA1431 | <b><i>rsaL</i></b> | <b>regulatory protein RsaL</b>         | <b>2.42E-02</b>        | <b>1.74</b>                |
| PA1793 | <i>ppiB</i>        | peptidyl-prolyl cis-trans isomerase B  | 2.45E-02               | 1.41                       |
| PA2501 |                    | hypothetical protein                   | 2.61E-02               | 1.53                       |
| PA4228 | <i>pchD</i>        | pyochelin biosynthesis protein PchD    | 2.65E-02               | 1.83                       |
| PA3049 | <i>rmf</i>         | ribosome modulation factor             | 2.69E-02               | 1.90                       |
| PA3385 | <i>tpbA</i>        | protein tyrosine phosphatase TpbA      | 2.77E-02               | 1.90                       |
| PA4130 |                    | probable sulfite or nitrite reductase  | 2.87E-02               | 1.55                       |
| PA5018 | <i>msrA</i>        | peptide methionine sulfoxide reductase | 3.03E-02               | 1.47                       |
| PA5351 | <i>rubA1</i>       | Rubredoxin 1                           | 3.36E-02               | -1.71                      |
| PA0423 | <i>pasP</i>        | Uncharacterized conserved protein      | 3.37E-02               | 1.42                       |
| PA4467 |                    | hypothetical protein                   | 3.41E-02               | 1.41                       |
| PA0980 |                    | hypothetical protein                   | 3.63E-02               | -1.53                      |
| PA2404 |                    | hypothetical protein                   | 1.30E-02               | 1.44                       |

<sup>a</sup> The genes regulated by QS are shown in boldface.



**Table S3.** Transcripts of RhIR regulon which were differentially regulated at 25°C and 37°C in PAO1, grown in PPGAS media (>1.4-fold).

| ORF    | Gene        | Gene                           | p-value<br>(37 vs. 25) | Fold-Change<br>(37 vs. 25) |
|--------|-------------|--------------------------------|------------------------|----------------------------|
| PA3479 | <i>rhIA</i> | rhamnosyltransferase chain A   | 0.274746               | 1.49                       |
| PA3477 | <i>rhIR</i> | transcriptional regulator RhIR | 0.116055               | 1.36                       |
| PA3478 | <i>rhIB</i> | rhamnosyltransferase chain B   | 0.12511                | 1.72                       |

**Table S4.** Oligonucleotides used in this study.

| Name            | Oligonucleotide sequence 5'→3' [plasmid constructed] <sup>a,b</sup>                    |
|-----------------|----------------------------------------------------------------------------------------|
| lecAF           | ACCC <b>GGTACCG</b> GTTCGACCC [pLECA70]                                                |
| lecAR           | TAAAATCC <b>CTCGAC</b> GGTAACCCCG [pLECA70]                                            |
| phzA1 EcoRI     | GTGGGG <b>GAATTC</b> GCGTAGCCGTCGCGGG [pHZA1-20]                                       |
| phzA1 KpnI      | CATTGCCA <b>GGTACCG</b> TCCACCGTGGCG [pHZA1-20]                                        |
| rhIA-pBADSc     | <b>CTAGCCT</b> GTTCGAAAATTTTGGGAGGTGTGAAATGCGGG [pBO- <i>rhIA</i> ]                    |
| rhIA-pBADaSc    | <b>AATTC</b> CCGCATTTACACCTCCCAAAAATTTTCGAACAGG [pBO- <i>rhIA</i> ]                    |
| rhIA-Sc-G78     | <b>CTAGCCT</b> TTTCGAAAATTTTGGGAGGTGTGAAATGCGGG [pBO- <i>rhIA</i> (ΔG78)]              |
| rhIA-aSc-G78    | <b>AATTC</b> CCGCATTTACACCTCCCAAAAATTTTCGAAAGG [pBO- <i>rhIA</i> (ΔG78)]               |
| rhIA-S-G92A     | <b>CTAGCCT</b> GTTCGAAAATTTTAGGAGGTGTGAAATGCGGG [pBO- <i>rhIA</i> (G92A)]              |
| rhIA-aS-G92A    | <b>AATTC</b> CCGCATTTACACCTCCTAAAAATTTTCGAACAGG [pBO- <i>rhIA</i> (G92A)]              |
| rhIA-FL-WT      | GATGGCC <b>GGCTAGCT</b> ACTTGTCTGCCGT [pBOC- <i>rhIA</i> and pBOC- <i>rhIA</i> (G92A)] |
| rhIA-RLc-WT     | CCAACAGACT <b>GAATTC</b> CCGCATTTACACCTCC [pBOC- <i>rhIA</i> ]                         |
| rhIA-RL-G92Ac   | CT <b>GAATTC</b> CCGCATTTACACCTCCTAAAAATTTTCGAACAGG [pBOC- <i>rhIA</i> (G92A)]         |
| rhIA- TS pBAD18 | GCAGCGATAGCT <b>GCTAGC</b> CTGTTTCG [pBO- <i>rhIA</i> , <i>rhIB</i> ]                  |
| rhIB-TR pBAD18  | CGATGAG <b>GAATTC</b> GTGCATGGGGCT [pBO- <i>rhIA</i> , <i>rhIB</i> ]                   |
| rhIA-ΔG78F      | GCGATAGCTGTTTGCCT <b>G</b> TTTCGAAAATTTTGGGAG [deletion of G78 in pBOC- <i>rhIA</i> ]  |
| rhIA-ΔG78R      | CTCCCAAAAATTTTCGAAC <b>C</b> AGGCAACAGCTATCGC [deletion of G78 in pBOC- <i>rhIA</i> ]  |
| lasI-Ter-Fw     | CGGACGTTTCT <b>GCTAGC</b> CTAG [pBO- <i>lasI</i> ]                                     |
| lasI-Ter-Rv     | GCCGACCAAT <b>GAATTC</b> GATCATC [pBO- <i>lasI</i> ]                                   |

|              |                                                                                      |
|--------------|--------------------------------------------------------------------------------------|
| lasI-C84A-Fw | AATTTGCATAAAATTCTTCAGCTT <u>A</u> CTATTTGGAGGAAGTGAAGATGA [pBOC- <i>lasI</i> (C84A)] |
| lasI-C84A-Rv | TCATCTTCACTTCCTCCAAATAG <u>I</u> AAGCTGAAGAATTTATGCAAATT [pBOC- <i>lasI</i> (C84A)]  |
| gyrAEC-FW    | <b>CTAGC</b> GGGATACAGTAGAGGGATAGCGGTTAGATGAGCG [pBOC- <i>gyrA</i> ]                 |
| gyrAEC-Rv    | <b>AATTC</b> GCTCATCTAACCGCTATCCCTCTACTGTATCCCG [pBOC- <i>gyrA</i> ]                 |
| lasR -Ter-Fw | CGCATG <b>GCTAG</b> CGGCAGG [pBOC- <i>lasR</i> ]                                     |
| lasR-Ter-Rv  | CCGTC <b>GAATTC</b> GGCCATAGCG [pBOC- <i>lasR</i> ]                                  |

<sup>a</sup> Introduced restriction sites are in boldface.

<sup>b</sup> Nucleotides mutated and exchanged in the oligonucleotides are underlined and shaded.

**Table S5.** Primers used for qRT-PCR.

| Amplicon     | Primer     | Sequence 5'→3'        | Position <sup>a</sup> | Length |
|--------------|------------|-----------------------|-----------------------|--------|
| <i>rhIA</i>  | rt_rhIA-F  | AACATTTCAACGTGGTGCTG  | 155                   | 100    |
|              | rt_rhIA-R  | ATTTCCACCTCGTCGTCCTT  | 254                   |        |
| <i>rhIR</i>  | rt_rhIR-F2 | CTGGGCTTCGATTACTACGC  | 112                   | 124    |
|              | rt_rhIR-R2 | CCCGTAGTTCTGCATCTGGT  | 215                   |        |
| <i>rhII</i>  | rt_rhII-F  | GGAGCGCTATTTTCGTTTCG  | 429                   | 100    |
|              | rt_rhII-R  | GTAGGCCCGGAAGCTGAT    | 528                   |        |
| <i>lasR</i>  | rt_lasR-F  | CGGTTTTCTTGAGCTGGAAC  | 15                    | 100    |
|              | rt_lasR-F  | GCCGAACAGGATCTTCGAG   | 114                   |        |
| <i>lasI</i>  | rt_lasI-F  | GGCTGGGACGTTAGTGTCAT  | 94                    | 100    |
|              | rt_lasI-F  | CCTGGGCTTCAGGAGTATCTT | 193                   |        |
| <i>lasB</i>  | rt_lasB-F  | AACCGTGCGTTCTACCTGTT  | 1279                  | 100    |
|              | rt_lasB-F  | TGGTGGCGGTCCAGTAGTA   | 1378                  |        |
| <i>phzA1</i> | rt_phzA1-F | AACCACTACATCCATTCTTCG | 355                   | 100    |
|              | rt_phzA1-R | CGGCTATTCCCAATGCAC    | 454                   |        |

<sup>a</sup> Position in the coding-region

## References

1. Miller J (1972) in *Experiments in Molecular Genetics*, Published by Cold Spring Harbor Laboratory (Cold Spring Harbor Laboratory, NY) pp 352-355.
2. Zhang Y, Miller RM (1992) Enhanced Octadecane dispersion and biodegradation by *Pseudomonas* rhamnolipid surfactant (Biosurfactant). *Appl Environ Microbiol* 58(10): 3276-3282.
3. Sambrook J, Fritsch EF, Maniatis T (1989) *Molecular Cloning: a Laboratory Manual*, 2nd edn. Cold Spring Harbor, NY: Cold Spring Harbor Laboratory.
4. Preston MJ, Seed PC, Toder DS, Iglewski BH, Ohman DE et al. (1997) Contribution of proteases and LasR to the virulence of *Pseudomonas aeruginosa* during corneal infections. *Infect Immun* 65(8): 3086-3090.
5. Spaink HP, Okker RJH, Wijffelman C A, Pees E, Lugtenberg B (1987) Promoters in the nodulation region of the *Rhizobium leguminosarum* Sym plasmid pRL1JI . *Plant Mol Biol* 9(1): 27-39.
6. Chung CT, Niemela SL, Miller RH (1989) One-step preparation of competent *Escherichia coli*: transformation and storage of bacterial cells in the same solution. *Proc Natl Acad Sci USA* 86(7): 2172-2175.
7. Irani VR, Rowe JJ (1997) Enhancement of transformation in *Pseudomonas aeruginosa* PAO1 by Mg<sup>+2</sup> and heat. *Biotechniques* 22(1): 54-56.
8. González-Cerón G, Miranda-Olivares OJ, Servín-González L (2009) Characterization of the methyl-specific restriction system of *Streptomyces coelicolor* A3 (2) and the role played by lateral acquired genes. *FEMS Microbiol Lett* 301(1): 35-43.
9. Waldminghaus T, Gaubig LC, Narberhaus F (2007) Genome-wide bioinformatic prediction and experimental evaluation of potential RNA thermometers. *Mol Genet Genomics* 278(5): 555-564.
10. Rozen S, Skaletsky HJ (2000) Primer3 on the WWW for general users and for biologist programmers. In *Bioinformatics Methods and Protocols*:

*Methods in Molecular Biology Vol. 132*, eds Krawetz S, Misener S (Humana Press Humana Totowa, NJ).

11. Livak KJ, Schmittgen TD (2001) Analysis of relative gene expression data using real-time quantitative PCR and the  $2^{-\Delta\Delta CT}$  Method. *Methods* 25(4): 402-408.
12. Laemmli UK (1970) Cleavage of structural proteins during the assembly of the head of bacteriophage T4. *Nature* 227(5259): 680-685.
13. Medina G, Juarez K, Valderrama B, Soberon-Chavez G (2003) Mechanism of *Pseudomonas aeruginosa* RhlR transcriptional regulation of the *rhlAB* promoter. *J Bacteriol* 185(20): 5976-5983.
14. Essar DW, Eberly L, Crawford IP (1990) Evolutionary differences in chromosome locations of four early genes of the tryptophan pathway in fluorescent pseudomonads: DNA sequences and characterization of *Pseudomonas putida trpE* and *trpGDC*. *J Bacteriol* 172(2): 867-883.
15. Chandrasekaran EV, Bemiller JN (1980) Constituent analyses of glycosaminoglycans. In *Methods in carbohydrate chemistry*, editor Whistler RL (Academic Press, New York) pp 89–96.
16. Beatson SA, Whitchurch CB, Sargent JL, Levesque RC, Mattick JS (2002) Differential Regulation of Twitching Motility and Elastase Production by Vfr in *Pseudomonas aeruginosa*. *J Bacteriol* 184(13): 3605-3613.
17. Middleton B, Rodgers HC, Cámara M, Knox AJ, Williams P et al. (2002) Direct detection of N-acylhomoserine lactones in cystic fibrosis sputum. *FEMS Microbiol Lett* 207(1): 1-7.
18. Shaw PD, Ping G, Daly SL, Cha C, Cronan JE Jr. et al. (1997) Detecting and characterizing N-acyl-homoserine lactone signal molecules by thin-layer chromatography. *Proc Natl Acad Sci USA* 94(12): 6036-6041.
19. Winson MK, Swift S, Fish L, Throup JP, Jorgensen F et al. (1998) Construction and analysis of *luxCDABE*-based plasmid sensors for investigating N-acyl homoserine lactone-mediated quorum sensing. *FEMS Microbiol Lett* 163(2): 185–92.
20. Zuker M (2003) Mfold web server for nucleic acid folding and hybridization prediction. *Nucleic Acids Res* 31(13): 3406-3415.

21. Hofacker IL (2003) Vienna RNA secondary structure server. *Nucleic Acids Res* 31(13): 3429-3431.
22. Jacobs MA, Alwood A, Thaipisuttikul I, Spencer D, Haugen E et al. (2003) Comprehensive transposon mutant library of *Pseudomonas aeruginosa*. *Proc Natl Acad Sci USA* 100(24): 14339-14344.
23. Rahim R, Ochsner U, Olvera C, Graninger M, Messner P et al. (2001) Cloning and functional characterization of the *Pseudomonas aeruginosa* *rhIC* gene that encodes rhamnosyltransferase 2, an enzyme responsible for di-rhamnolipid biosynthesis. *Mol Microbiol* 40(3): 708-718.
24. Pesci EC, Pearson JP, Seed PC, Iglewski BH (1997) Regulation of las and rhl quorum sensing in *Pseudomonas aeruginosa*. *J Bacteriol* 179(10):3127-31321.
25. Medina G, Juárez K, Díaz, R, Soberón-Chávez G (2003) Transcriptional regulation of *Pseudomonas aeruginosa* *rhIR* encoding a quorum sensing regulatory protein. *Microbiology* 149(Pt11): 3073-3081.
26. West SEH, Schweizer HP, Dall C, Sample AK, Runyen-Janeck LJ (1994) Construction of improved *Escherichia-Pseudomonas* shuttle vectors derived from pUC18/19 and sequence of the region required for their replication in *Pseudomonas aeruginosa*. *Gene* 148(1): 81-86.
27. Waldminghaus T, Fippinger A, Alfsmann J, Narberhaus F (2005) RNA thermometers are common in  $\alpha$ - and  $\gamma$ -proteobacteria. *Biol Chem* 386(12): 1279-1286.
